# Supplementary material for: Stimuli-Responsive Graphene Quantum Dots-Capped Amine-Modified Wheat Cellulose Magnetic Fiber Nanocomposites for Targeted Curcumin Delivery in Breast Cancer
Source: Research Square preprint supplement (doi:10.21203/rs.3.rs-6627434/v1), 2025-06-18
Supplement: Supplementary file 1 [file 4d7cda035e49520508899427.docx]

**Supplementary file**


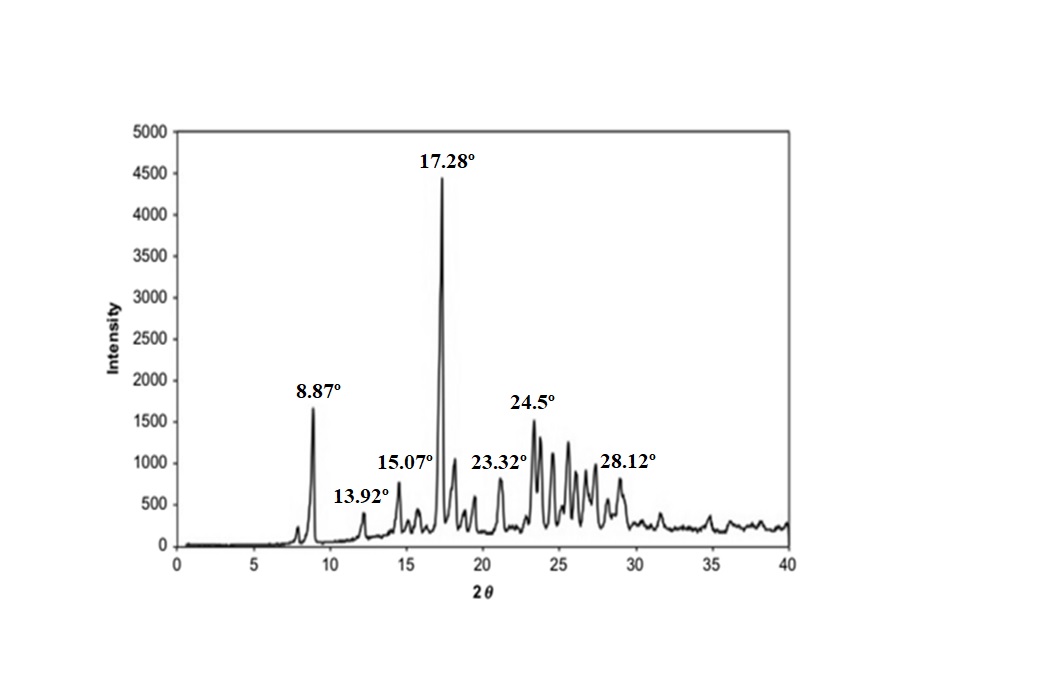


**Figure S1**: Diffractogram of CUR


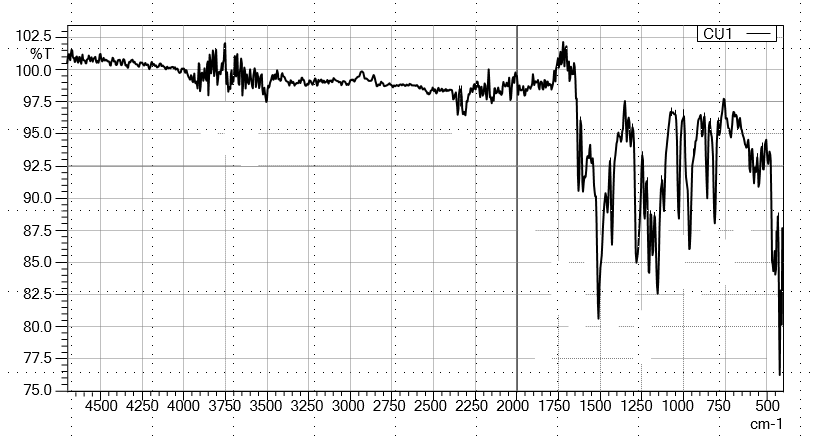


**Figure S2**: FTIR of CUR


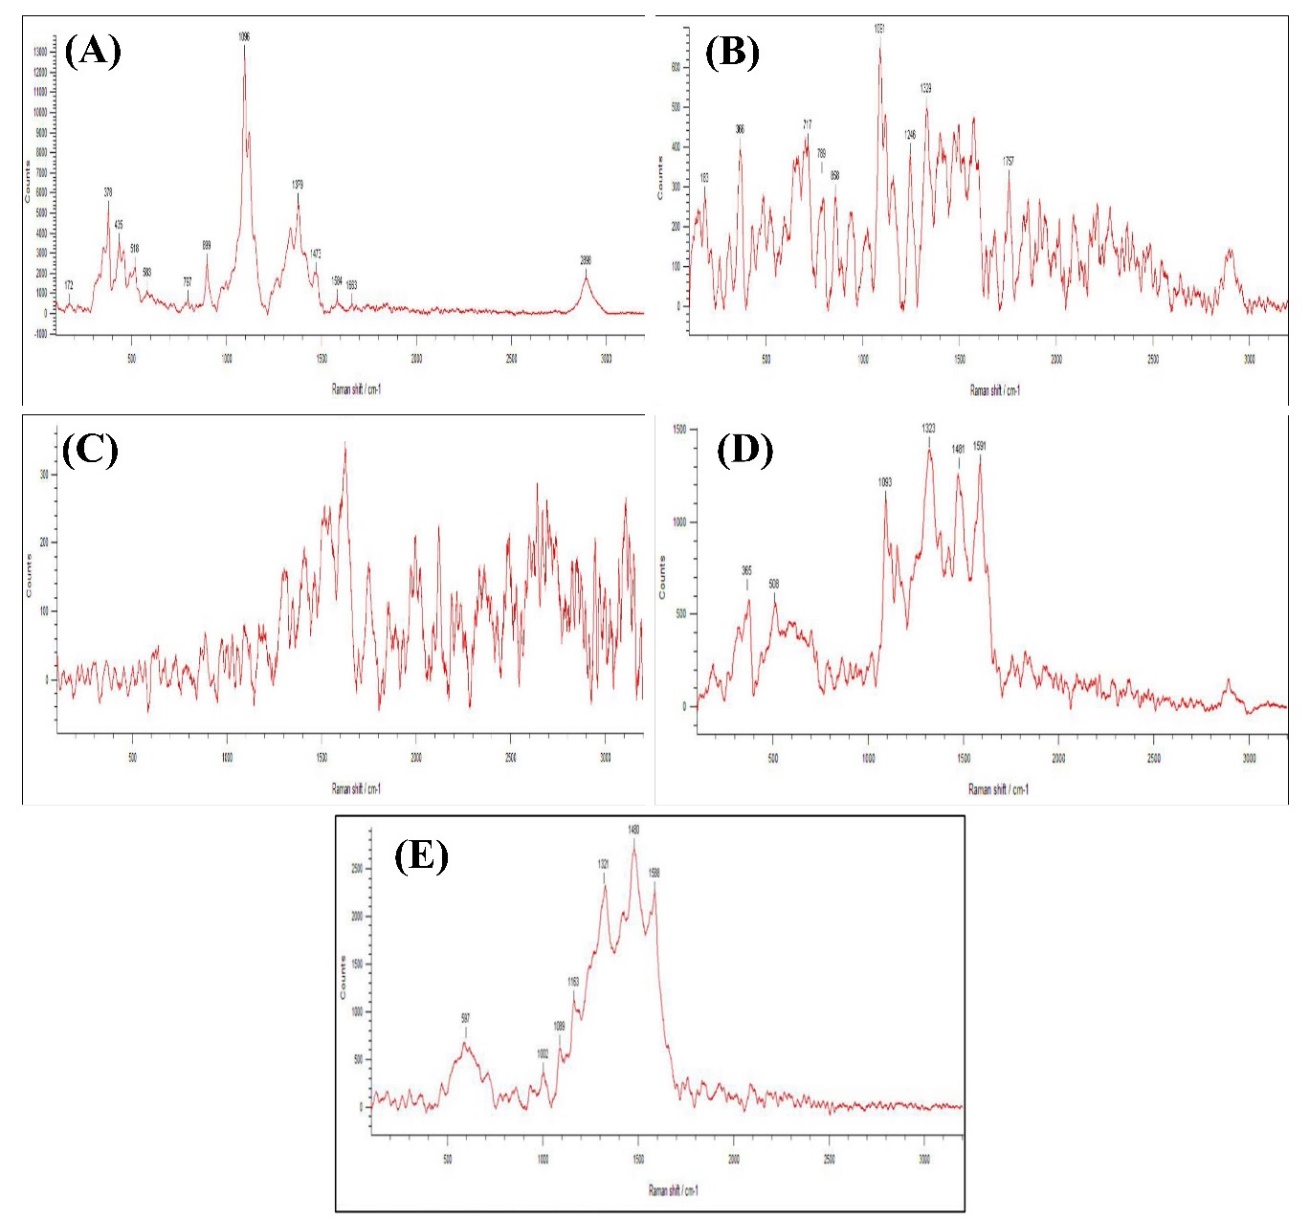


**Figure S3:** Raman spectra of (A) WCNFs; (B) MCNFs; (C) NH2-MCNFs; (D) Wf-GQDs; (E) GQDs-CUR@NH2-MCNFs


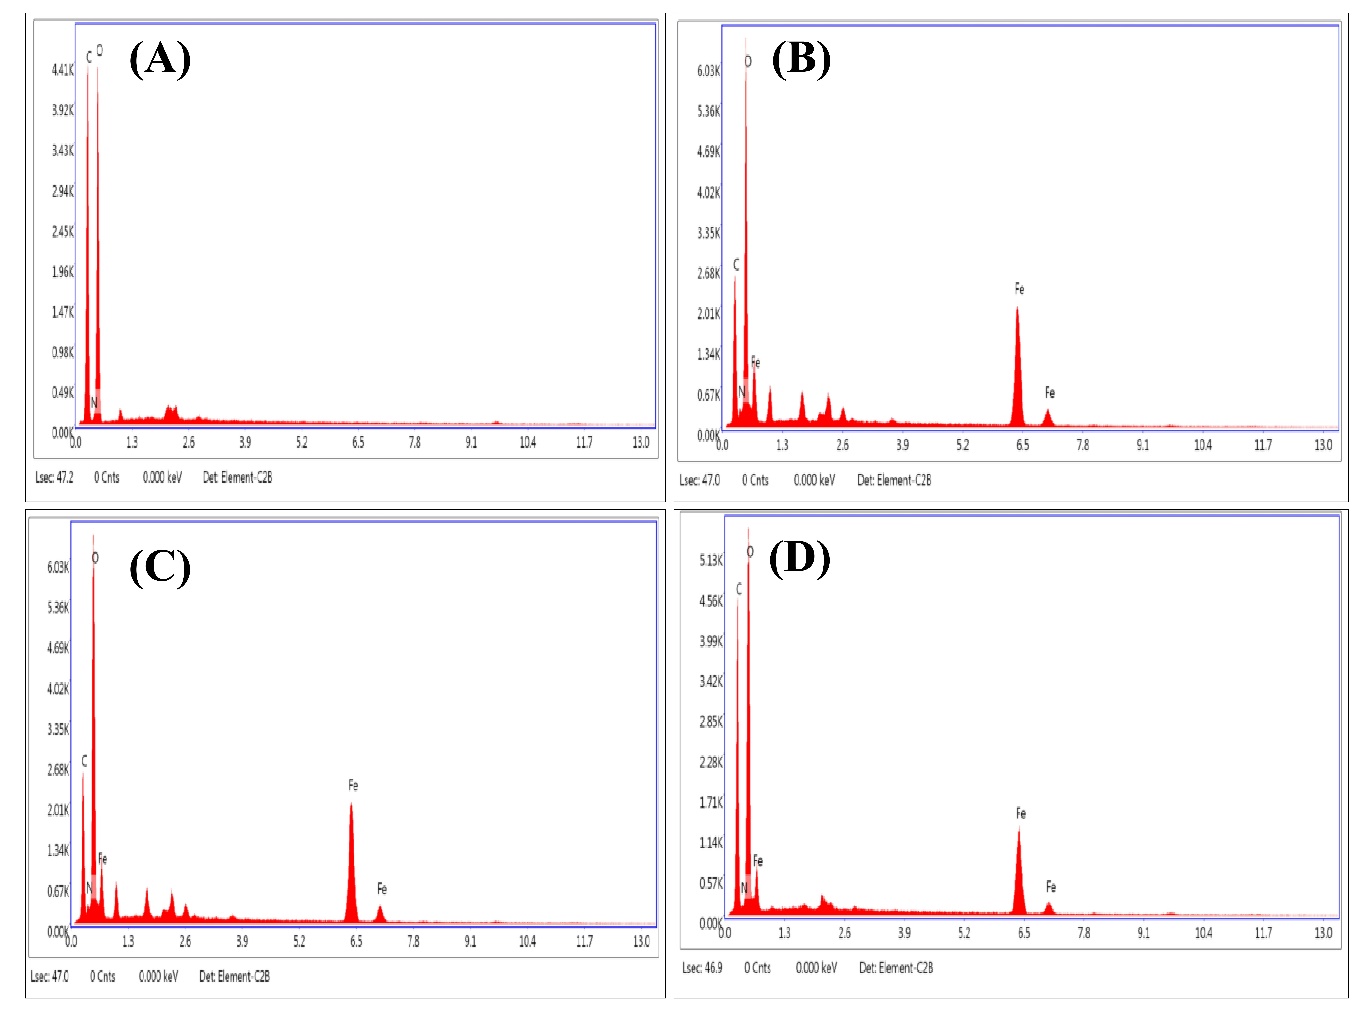


**Figure S4:** EDX spectrum of (A) WCNFs;(B) MCNFs; (C) CUR@NH2-MCNFs; (D) GQDs-CUR@NH2-MCNFs


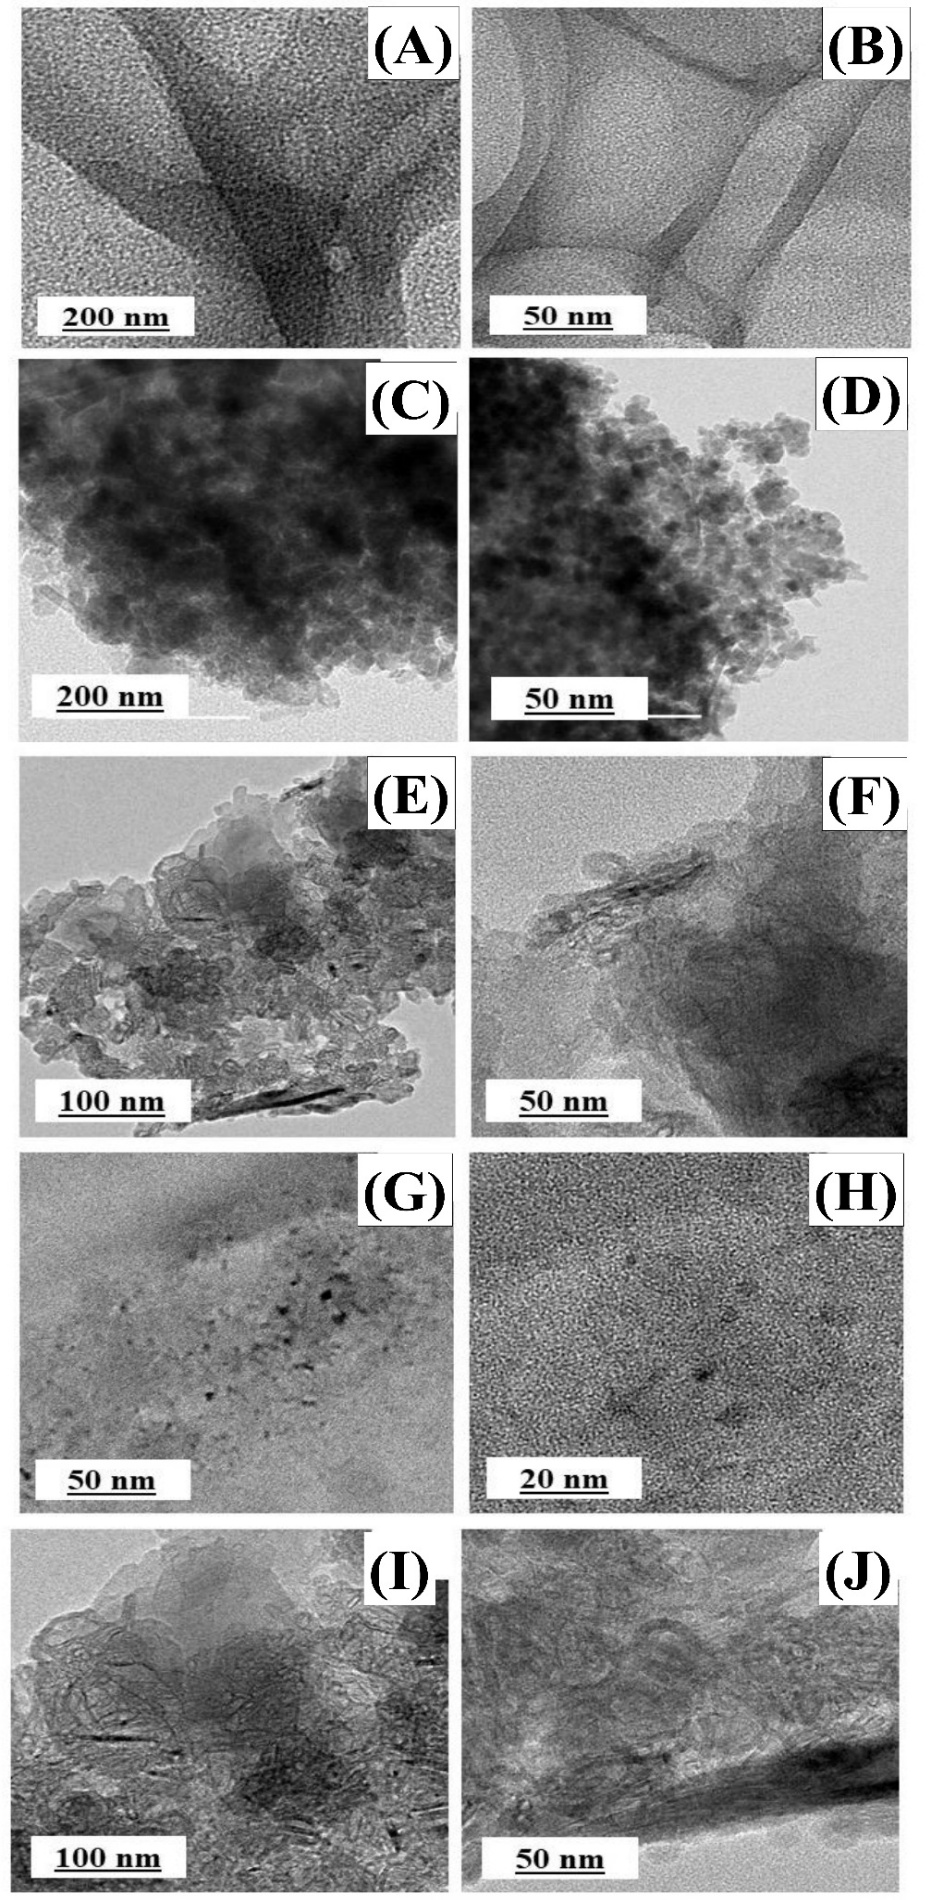


**Figure S5:** TEM images of WCNFs (A, B), MCNFs (C, D), CUR@NH2-MCNFs (E, F), Wf-GQDs (G, H), and CUR@NH2-MCNFs (I, J)


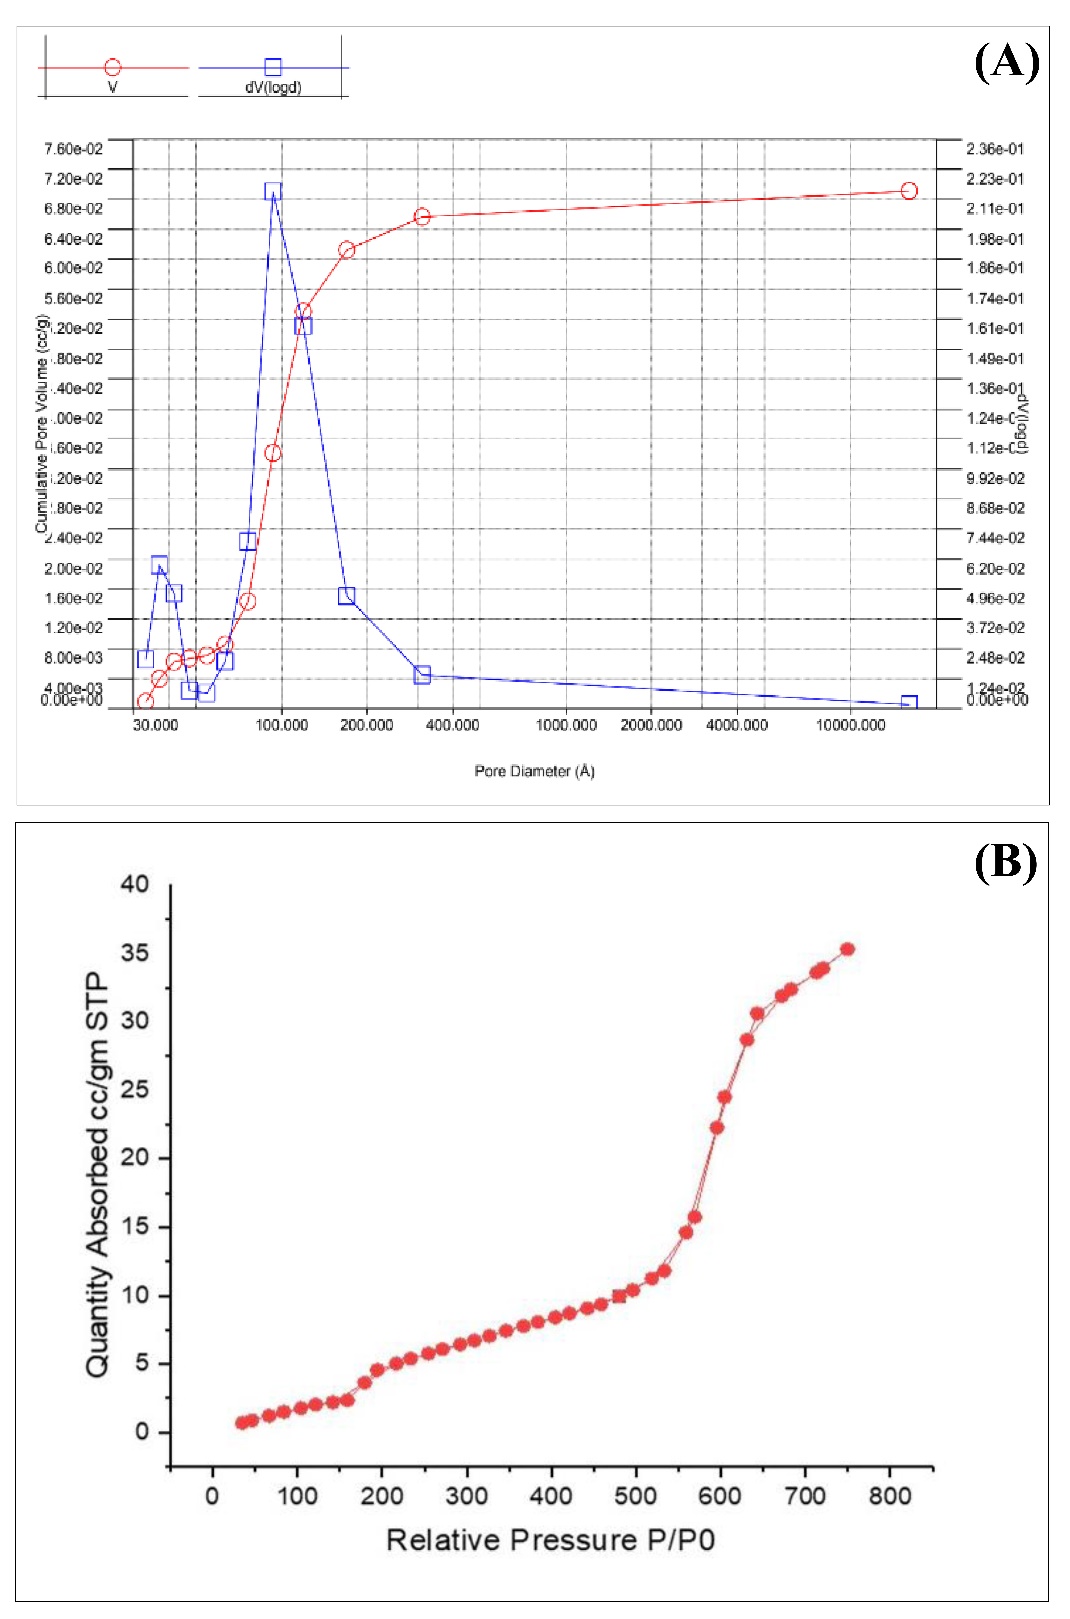


**Figure S6:** (A)BET surface area including relative pressure vs adsorption-desorption curve of synthesized WCNFs and (B)pore volume and pore diameter of synthesized WCNFs


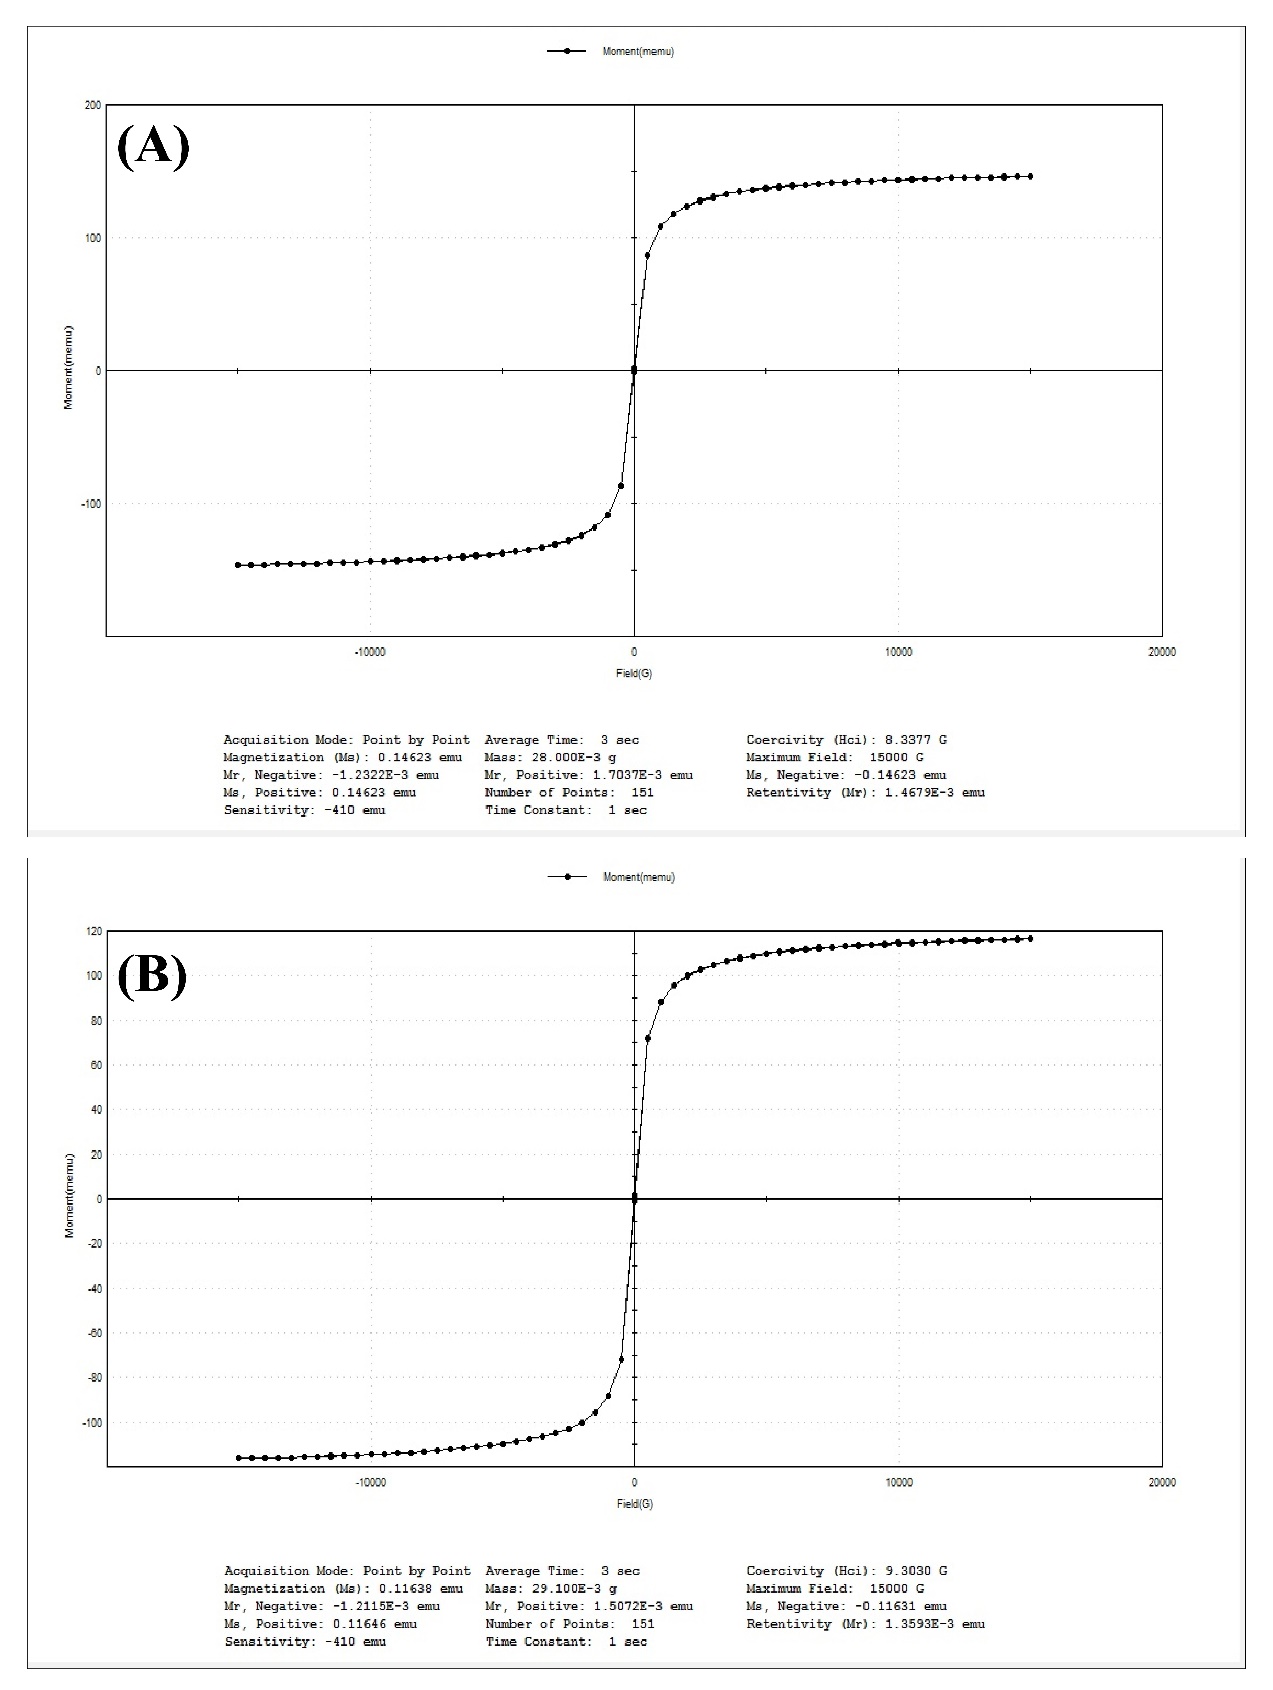


**Figure S7:** Magnetization curves of (A) MCNFs and (B) GQDs-CUR@NH2-MCNFs


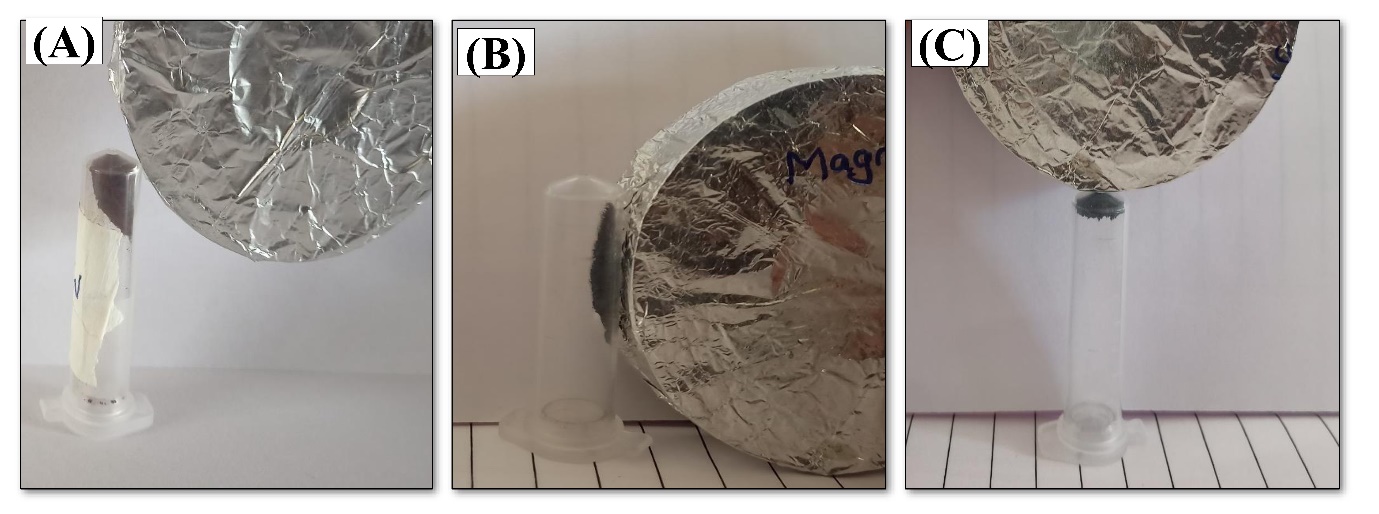


**Figure S8**: Magnetic responsive nature of (A) MNPs; (B) MCNFs; (C) GQDs-CUR@NH2-MCNFs


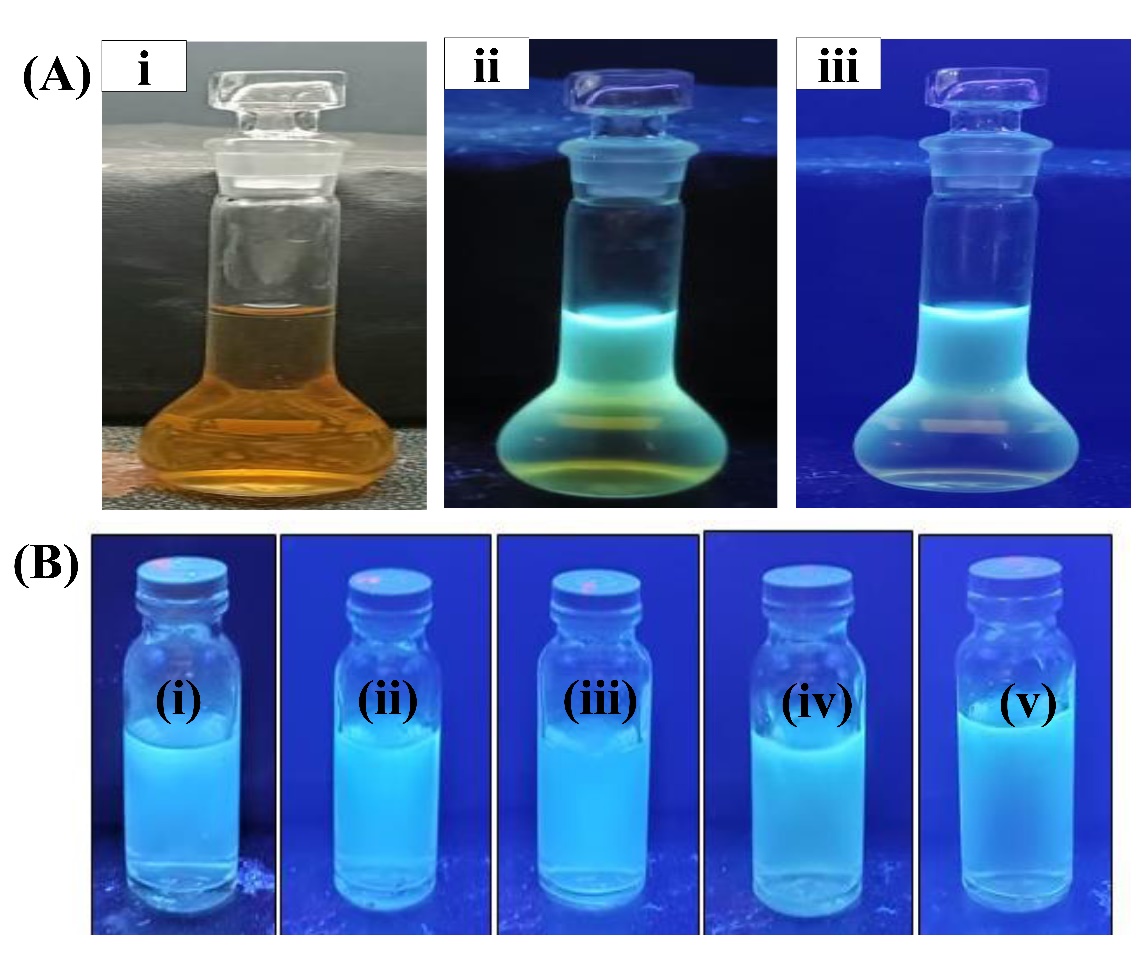


**Figure S9: (A)** Wf-GQDs solution in(i) visible light (ii) UV light at a short wavelength of 254 nm and (iii) UV light at a long wavelength of 365 nm. **(B)** Different dilutions of Wf-GQDs from 1 mL, 2 mL, 3 mL, 4 mL, and 5 mL to 10 mL in A, B, C, D, and E samples, respectively.

**
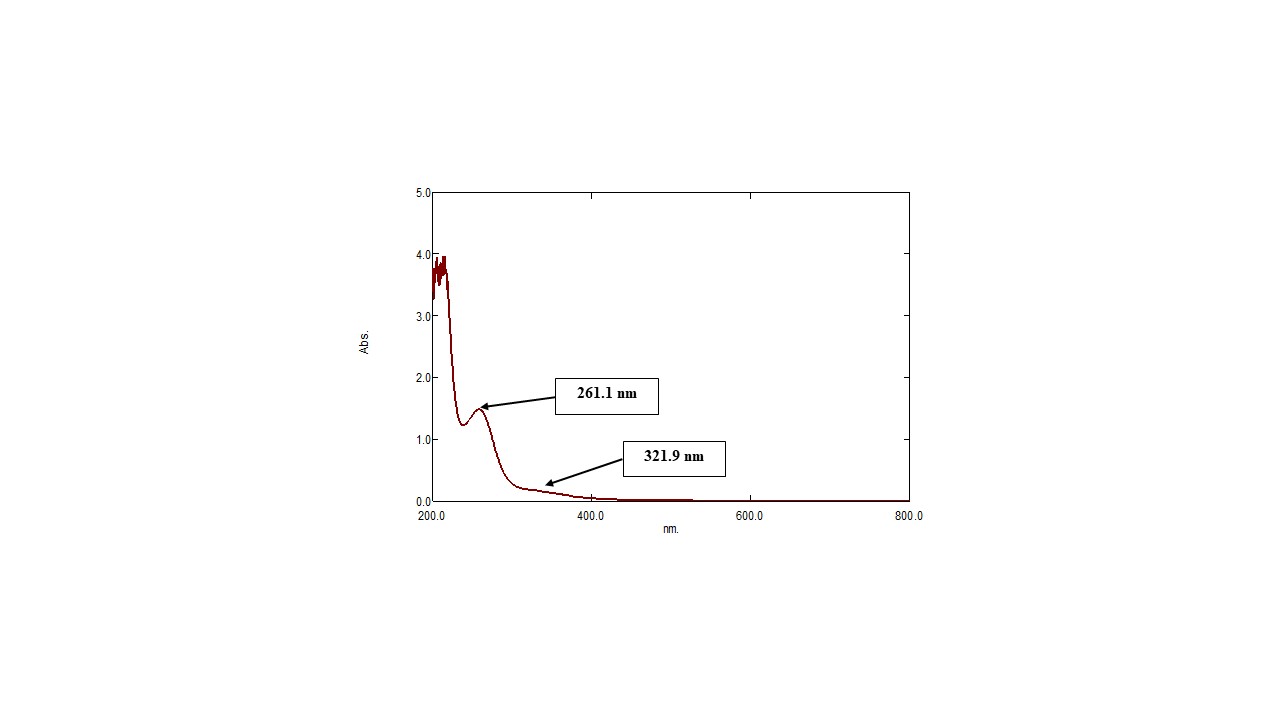
**

**Figure S10**: UV Vis spectra of Wf-GQDs


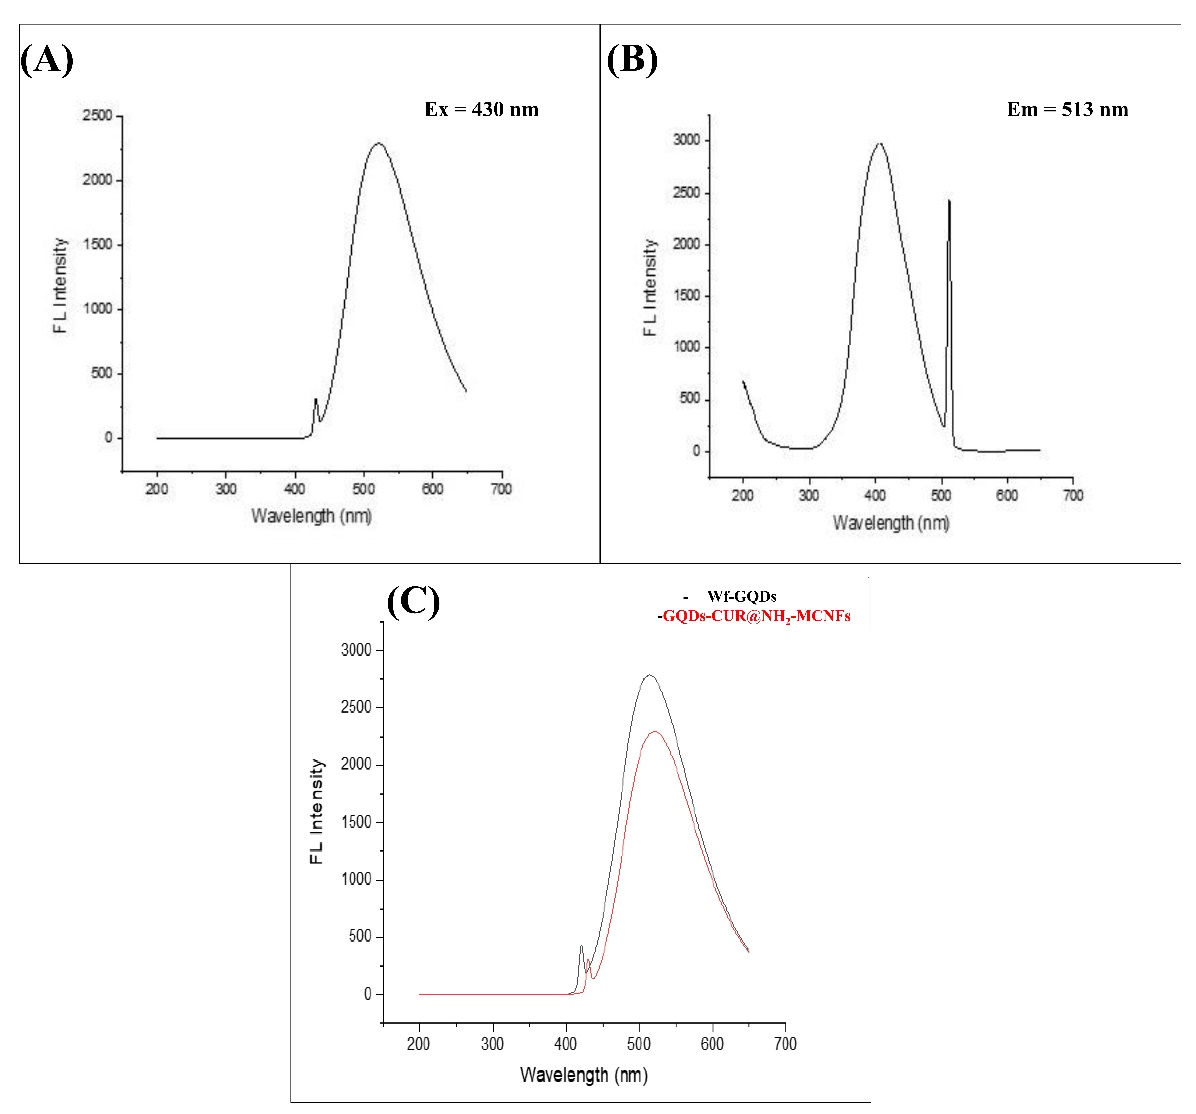


**Figure S11: (**A) Excitation spectra; (B) emission spectra of GQDs-CUR@NH2-MCNFs; and (C) fluorescence spectra of Wf-GQDs and GQDs-CUR@NH2-MCNFs


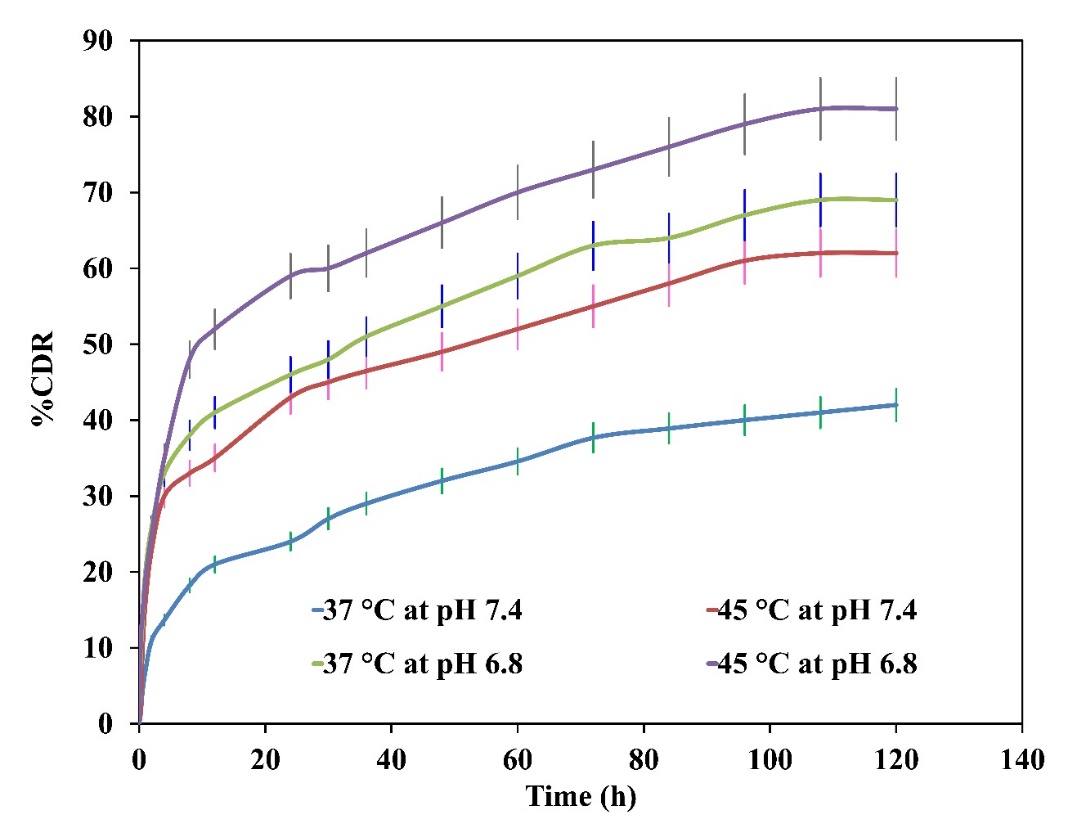


**Figure S12:** Cumulative ‘CUR’ release from the GQDs-CUR@NH2-MCNFs under different pH and temperature conditions


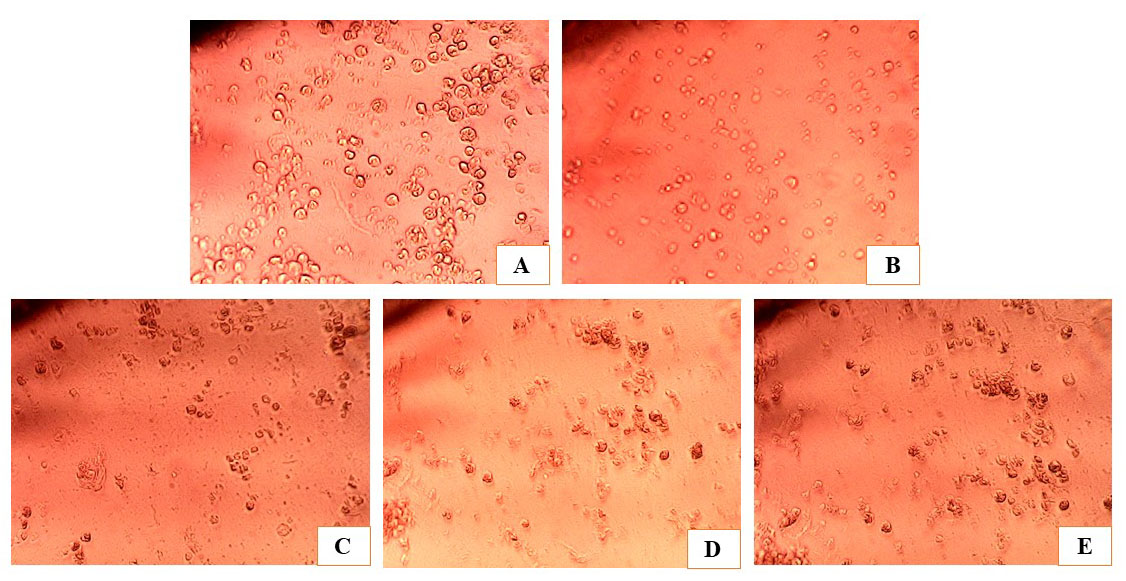


**Figure S13**: Effect of (A) Control; (B) Std. 5 FU; (C) CUR; (D) CUR@NH2-MCNFs and (E) GQDs-CUR@NH2-MCNFs measured against MCF-7 Breast cancer cell line by MTT assay


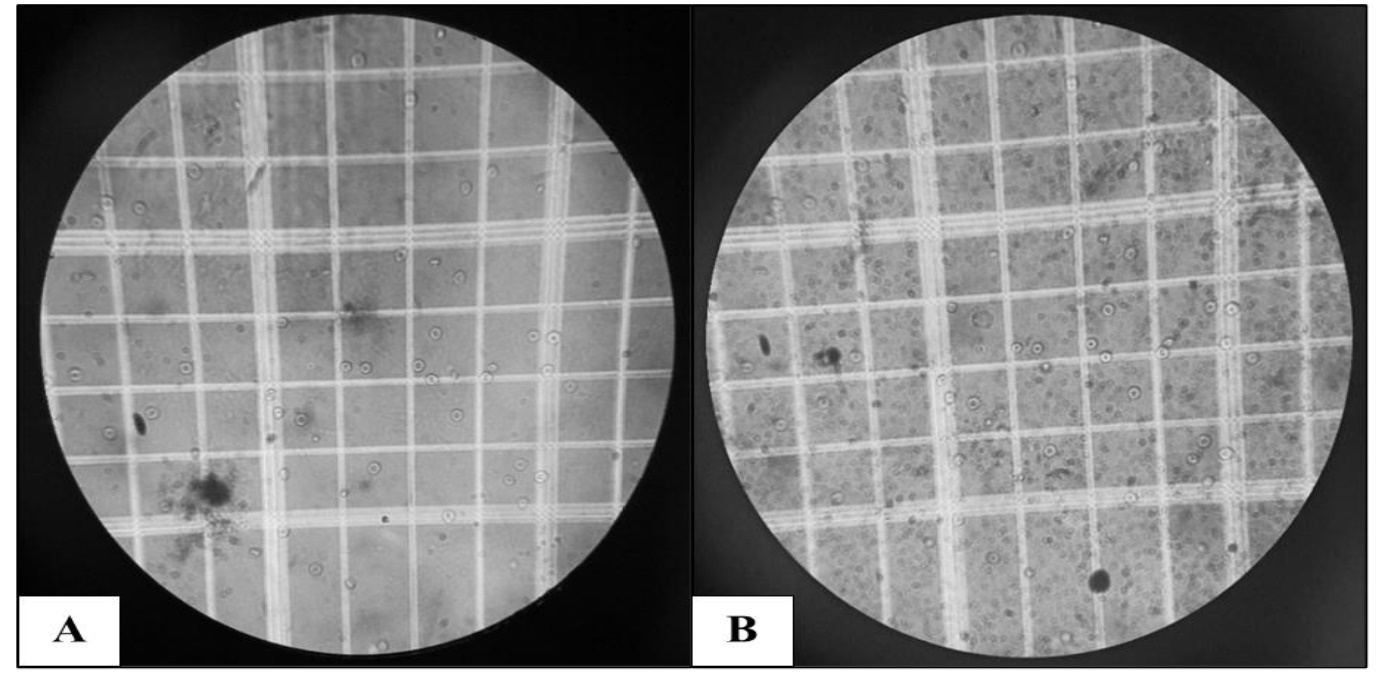


**Figure S14**: A) Depicts the normal structure of erythrocytes; (B) illustrates the structure of GQDs-CUR@NH2-MCNFs-treated erythrocytes.
